# Supplementary material
Source: ML conference proceedings conference paper supplement (https://openaccess.thecvf.com/content/CVPR2026/html/Mazur_4D_Primitive-Mache_Glueing_CVPR_2026_paper.html)
Supplement: Supplementary file 1 [file supp_mat.pdf › supp_mat/supp_mat.pdf]

# 4D Primitive-Mâché: Glueing Primitives for Persistent 4D Scene Reconstruction

## Supplementary Material

### 1. System Analysis

We analyse the behaviour of our system across several dimensions.

**Robustness to geometry frontend** Since our method relies on the outputs of feed-forward geometry estimation networks, we first examine its sensitivity to the choice of model. Table Sec. 1 shows that 4DPM is robust to the choice of frontend, yielding a consistent improvement in F-score across all configurations (by at least +0.235).

**Component ablation** Table Sec. 1 presents a detailed ablation of our system’s components. Our correspondence filtering mechanism is critical to performance: removing it causes a drop in F-score of 0.15 (−19%). Second-order optimisation substantially outperforms first-order Adam. Replacing Alltracker with SEA-RAFT [4] results in a modest performance degradation. Finally, our method is robust to segmentation quality: using unfiltered SAMv2 masks or the lighter SAMv2-Small variant yields performance comparable to the full pipeline.

|                | F-score | delta F-score |
|----------------|---------|---------------|
| $\pi^3$        | 0.5219  | -             |
| VGGT           | 0.5330  | -             |
| DAv3           | 0.4587  | -             |
| $\pi^3$ + Ours | 0.7573  | <b>+0.235</b> |
| VGGT + Ours    | 0.7700  | <b>+0.237</b> |
| DAv3 + Ours    | 0.7103  | <b>+0.256</b> |

Table 1. **Robustness to different geometry estimators on HO3D.**

|                             | F-score       |
|-----------------------------|---------------|
| Unfiltered correspondence   | 0.6401        |
| FO optimiser                | 0.7228        |
| SEA-RAFT for correspondence | 0.7727        |
| Unfiltered masks from SAMv2 | 0.7765        |
| SAMv2-small                 | 0.7947        |
| Ours                        | <b>0.7948</b> |

Table 2. **Ablation study on Multi-obj dataset.**

### 2. Additional Qualitative Results

### 3. Analytical Jacobian Derivation

We provide analytical Jacobians for a single pairwise residual of an object. In practice, the Hessian is block-diagonal with respect to objects.

Given relative residuals  $r = T_j^{-1}T_iX_i - \widehat{X}_j$ , we derive its analytical right Jacobians  $\mathbf{J} = [\mathbf{J}_{T_i} | \mathbf{J}_{T_j}]$  with respect to object poses  $T_i$  and  $T_j$ .

Let  $Z = T_j^{-1}T_i$ , then:

$$\frac{dZ}{dT_i} = \text{Id} \quad (1)$$

$$\frac{dZ}{dT_j} = -\text{Ad}(Z^{-1}) \quad (2)$$

From [3], if  $Z = \begin{bmatrix} R_Z & t_Z \\ 0 & 1 \end{bmatrix}$ ,  $R_Z \in \mathbb{SO}(3)$ ,  $t_Z \in \mathbb{R}^3$

and  $\text{Act}$  is the action operator of  $\mathbb{SE}(3)$  group on  $\mathbb{R}^3$ , i.e  $\text{Act}(Z, X) = R_Z X + t_Z$ , then:

$$\frac{d \text{Act}(Z, X)}{dZ} = \begin{bmatrix} R_Z & -R_Z[X]_{\times} \end{bmatrix} \quad (3)$$

Then, using chainrule,

$$\begin{aligned} \frac{dr}{dT_i} &= \frac{d(ZX_i - \widehat{X}_j)}{dT_i} = \\ &= \frac{d \text{Act}(Z, X)}{dZ} \frac{dZ}{dT_i} = \begin{bmatrix} R_Z & -R_Z[X_i]_{\times} \end{bmatrix} \end{aligned} \quad (4)$$

$$\begin{aligned} \frac{dr}{dT_j} &= \frac{d(ZX_i - \widehat{X}_j)}{dT_j} = \frac{d \text{Act}(Z, X_i)}{dZ} \frac{dZ}{dT_j} = \\ &= \begin{bmatrix} R_Z & -R_Z[X_i]_{\times} \end{bmatrix} (-\text{Ad}(Z^{-1})) \end{aligned} \quad (5)$$

The last equation can be simplified further. Recall that

$Z^{-1} = \begin{bmatrix} R_Z^T & -R_Z^T t_Z \\ 0 & 1 \end{bmatrix}$  and, therefore, its adjoint is:

$$\text{Ad}(Z^{-1}) = \begin{bmatrix} R_Z^T & [-R_Z t_Z]_{\times} R_Z^T \\ 0 & R_Z^T \end{bmatrix} \quad (6)$$

Then the second-block column of  $\frac{dr}{dT_j}$  corresponding to rotation is:

$$\begin{aligned} &-R_Z[-R_Z t_Z]_{\times} R_Z^T + R_Z[X_i]_{\times} R_Z^T = \\ &= [t_Z]_{\times} + [R_Z X_i]_{\times} = \\ &= [R_Z X_i + t_Z]_{\times} = [\text{Act}(Z, X_i)]_{\times} \end{aligned} \quad (7)$$

### 4. First Order vs Second Order Study

We compare the performance of our system using Gauss-Newton optimisation against Adam. In Sec. 4, we report the resulting F-score on our Multi-Object dataset for our

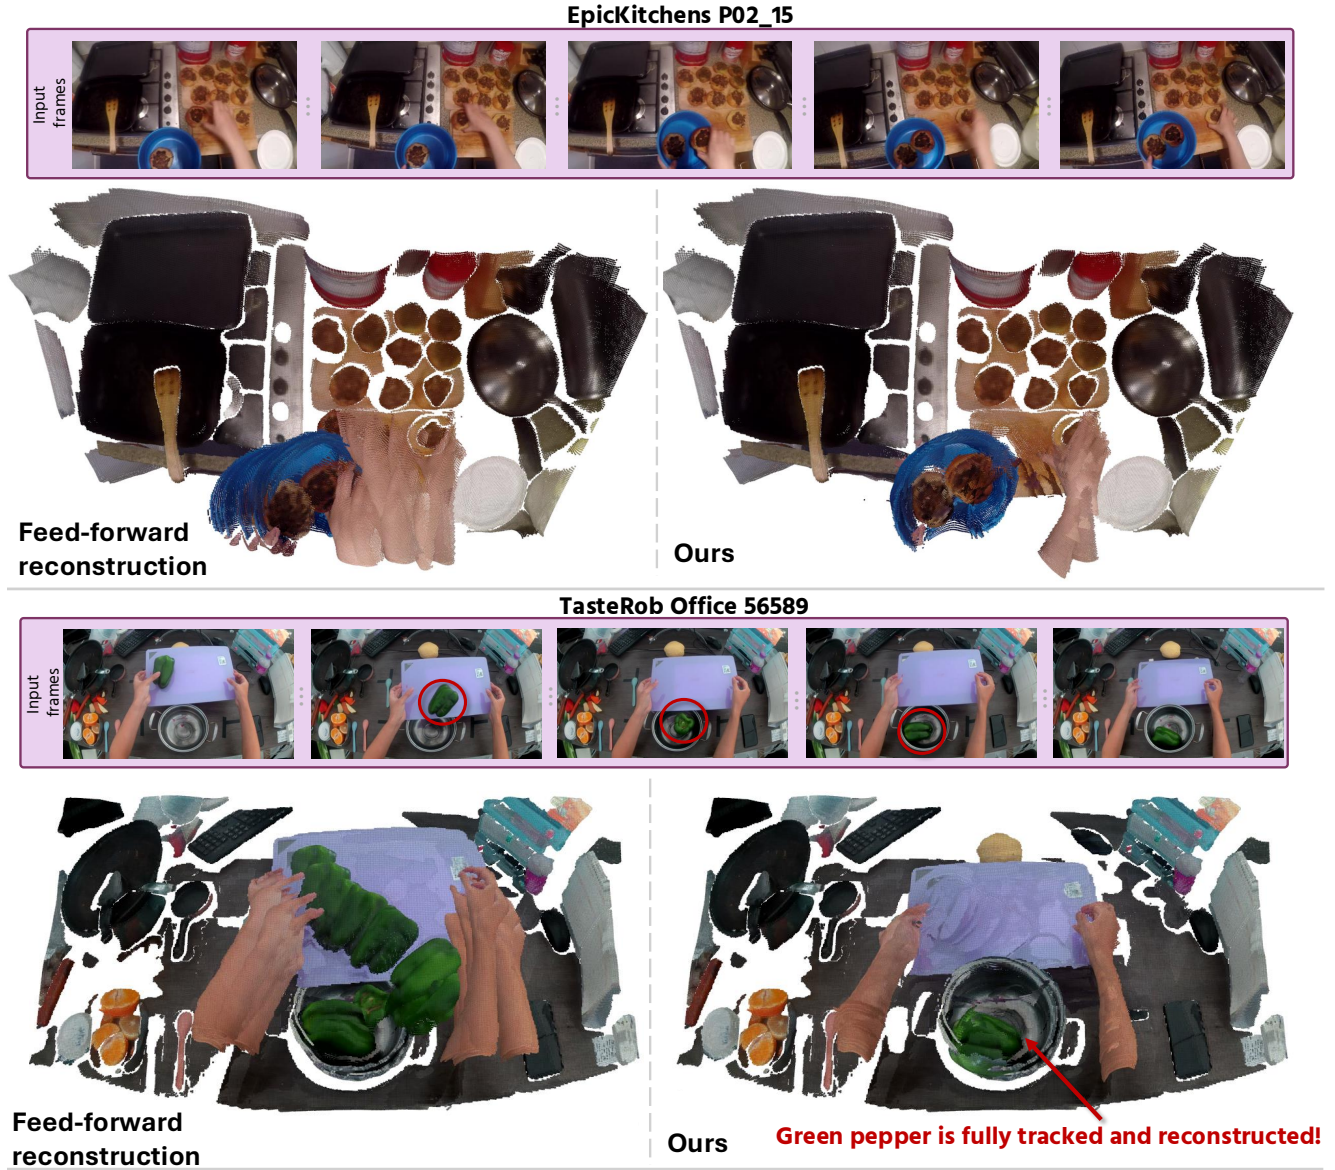

Figure 1. **Reconstruction on ego-centric data.** Our system runs of the box on different data distributions, such as ego-centric data, including TasteRob [5] and EpicKitchens [1] datasets.

system compared to a variant using the first-order Adam optimiser [2]. Interestingly, even with a generous time budget, the first-order optimiser never converged to the same level of quality, both quantitatively and qualitatively. In our experiments, the translational component of the transformation was often estimated correctly, while the rotational component remained problematic.

## 5. Run-Time Analysis

In Sec. 5, we report a performance breakdown of our system. The frontend dominates overall runtime, with video

|                 | F-Score       | Time Spent |
|-----------------|---------------|------------|
| Adam 500 steps  | 0.6342        | 20s        |
| Adam 1k steps   | 0.6474        | 40s        |
| Adam 10k steps  | 0.7228        | 400s       |
| Ours (10 steps) | 0.7843        | 2s         |
| Ours (50 steps) | <b>0.7948</b> | <b>10s</b> |

Table 3. **Reconstruction quality of our method with different optimisers and computational budgets.**

segmentation being the most expensive component as we propagate masks for all potential objects in the scene (typi-

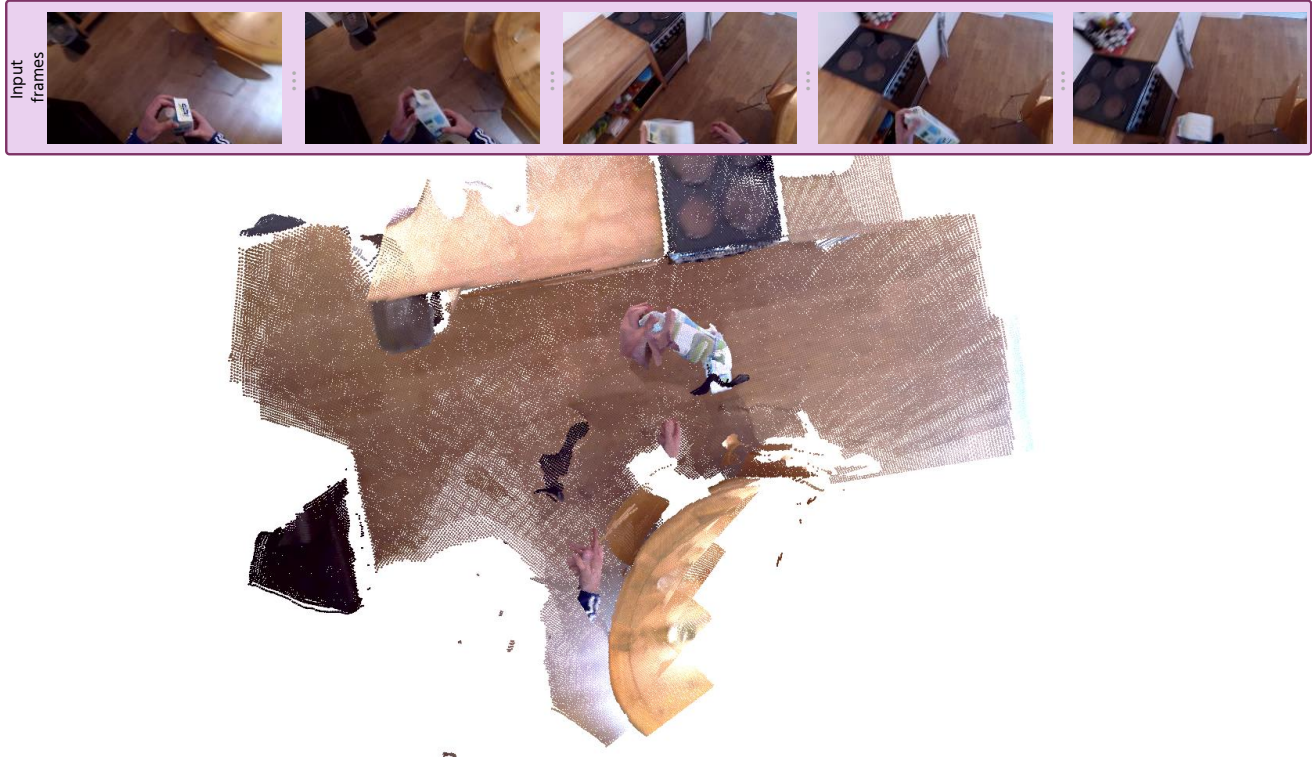

Figure 2. **Failure Cases.** Our system struggles with rapid motion (e.g. shaking the milk carton) and object re-identification when hands disappear from and re-enter the camera view.

| Component                 | Time Spent | Peak Memory |
|---------------------------|------------|-------------|
| Frontend (correspondence) | 2.3s       | 6.9GB       |
| Frontend ( $\pi^3$ )      | 5.6s       | 8.7GB       |
| Frontend (segmentation)   | 42s        | 13.1GB      |
| Frontend (combined)       | 50s        | -           |
| Backend                   | 9.6s       | 14.5GB      |
| Motion Segmentation       | 2s         | 7.6GB       |

Table 4. **Performance and Memory benchmarking.**

cally around 50-100 objects). Backend performance scales with image resolution: our dense alignment at  $512 \times 512$  takes approximately 10 seconds, reducing to 2.5 seconds at  $256 \times 256$ .

Further optimisation of the backend is possible, though the frontend now represents the primary opportunity for improvement. Additionally, our current implementation does not include early termination of the optimisation; incorporating this could yield further performance gains.

## References

- [1] Dima Damen, Hazel Doughty, Giovanni Maria Farinella, Sanja Fidler, Antonino Furnari, Evangelos Kazakos, Davide Moltisanti, Jonathan Munro, Toby Perrett, Will Price, and

Michael Wray. Scaling egocentric vision: The epic-kitchens dataset. In *Proceedings of the European Conference on Computer Vision (ECCV)*, 2018. 2

- [2] Diederik P. Kingma and Jimmy Ba. Adam: A method for stochastic optimization. *CoRR*, abs/1412.6980, 2014. 2
- [3] Joan Sola, Jeremie Deray, and Dinesh Atchuthan. A micro lie theory for state estimation in robotics. *arXiv preprint arXiv:1812.01537*, 2018. 1
- [4] Yihan Wang, Lahav Lipson, and Jia Deng. Sea-raft: Simple, efficient, accurate raft for optical flow. In *Proceedings of the European Conference on Computer Vision (ECCV)*, 2024. 1
- [5] Hongxiang Zhao, Xingchen Liu, Mutian Xu, Yiming Hao, Weikai Chen, and Xiaoguang Han. Taste-rob: Advancing video generation of task-oriented hand-object interaction for generalizable robotic manipulation. In *Proceedings of the IEEE Conference on Computer Vision and Pattern Recognition (CVPR)*, 2025. 2
